# Supplementary material for: Atomic-scale mechanistic features of oxide ion conduction in apatite-type germanates
Source: Royal Society of Chemistry journal article supplement (doi:10.1039/b716814d), 2007-12-17

## **Atomic-scale mechanistic features of oxide ion conduction in apatite-type germanates**

Electronic Supplementary Material

### 1. Conductivity data for $\text{La}_{9.33}(\text{GeO}_4)_6\text{O}_2$

#### Experimental

Single phase  $\text{La}_{9.33}(\text{GeO}_4)_6\text{O}_2$  was prepared via a Pechini-type sol gel route. Stoichiometric amounts of  $\text{La}(\text{NO}_3)_3 \cdot 9\text{H}_2\text{O}$  and  $\text{GeO}_2$  were dissolved by heating in water. Once dissolved, citric acid and ethylene glycol were added (1.75 moles per mole of La), and the mixture evaporated on a hot plate until a clear gel was obtained. The gel was then transferred to a furnace and heated at  $2^\circ\text{C}/\text{min}$  to  $800^\circ\text{C}$  before holding at this temperature for 12 hours. Pellets (1.6 cm diameter) for conductivity measurements were prepared as follows: the powders were ball milled (350 rpm, Fritsch Pulverisette 7 Planetary Mill) for 1 hour before pressing at  $8000 \text{ kg cm}^{-2}$ . The pressed pellets were then heated at  $1300^\circ\text{C}$  for 2 hours, leading to a density of 91% theoretical. Both sides of the pellet were coated with Au paste and then heated to  $700^\circ\text{C}$  for 1 hour to ensure bonding to the pellet. Conductivity measurements were made in air using AC impedance spectroscopy (Hewlett Packard 4182A impedance analyser). Phase purity was confirmed through X-ray powder diffraction (Panalytical X'Pert Pro diffractometer,  $\text{Cu K}\alpha_1$  radiation).

Figure 1 Conductivity data for  $\text{La}_{9.33}(\text{GeO}_4)_6\text{O}_2$

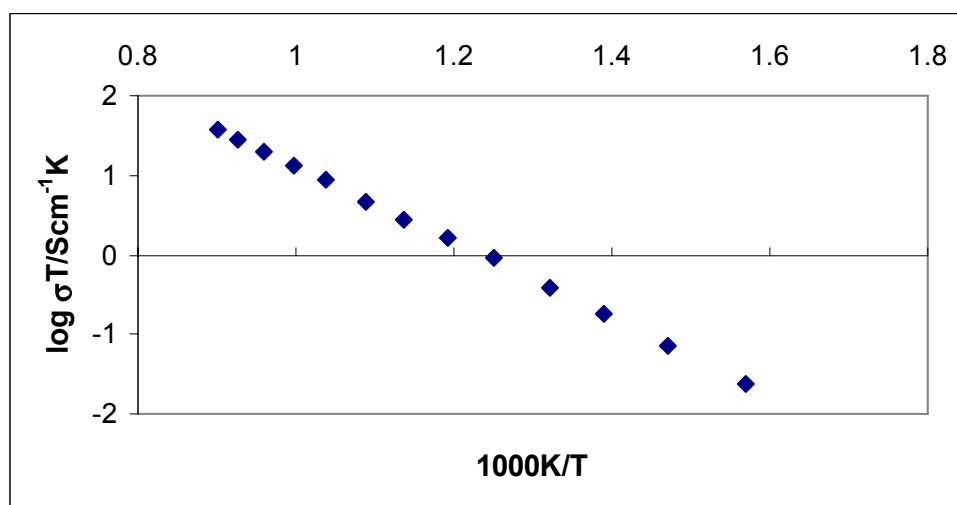

2. Interatomic potentials, comparison between calculated and experimental structures, and defect energies

Table 1. Interatomic potentials employed in the modelling studies

| Buckingham      | A (eV)    | C (eV Å <sup>-6</sup> ) | ρ (Å)  | Y     | K(eV Å <sup>-2</sup> ) |
|-----------------|-----------|-------------------------|--------|-------|------------------------|
| Ge core O shell | 1497.3996 | 0.325646                | 16.00  | 4.00  |                        |
| La core O shell | 4579.23   | 0.30437                 | 0.00   | 3.00  |                        |
| O shell O shell | 22764.0   | 0.1490                  | 27.879 | -2.89 | 74.92                  |

Table 2a. Comparison between experimental and calculated structures for  $\text{La}_{9.33}(\text{GeO}_4)_6\text{O}_2$

|                       | experimental | calculated | difference |
|-----------------------|--------------|------------|------------|
| a (Å)                 | 9.9117       | 9.996269   | 0.85 %     |
| b (Å)                 | 9.9117       | 9.996269   | 0.84 %     |
| c (Å)                 | 7.2833       | 7.138881   | -1.98 %    |
| Vol (Å <sup>3</sup> ) | 619.66       | 617.784    | -0.3 %     |

Table 2b. Comparison between calculated and experimental bond distances for  $\text{La}_{9.33}(\text{GeO}_4)_6\text{O}_2$

| Bond |       | Experimental<br>(Å) | Calculated<br>(Å) | Difference<br>(Å) |
|------|-------|---------------------|-------------------|-------------------|
| La1  | O1    | 2.7862              | 2.8039            | 0.0177            |
|      | O2    | 2.5179              | 2.4984            | -0.0195           |
|      | O3 x2 | 2.4504              | 2.4149            | -0.0355           |
|      | O3 x2 | 2.6342              | 2.5966            | -0.0376           |
|      | O4    | 2.3395              | 2.3654            | 0.0259            |
| La2  | O1 x3 | 2.4712              | 2.4573            | -0.0139           |
|      | O2 x3 | 2.5821              | 2.5894            | 0.0073            |
|      | O3 x3 | 2.9132              | 2.9529            | 0.0397            |
| Ge   | O1    | 1.7348              | 1.7207            | -0.0141           |
|      | O2    | 1.7264              | 1.7425            | 0.0161            |
|      | O3 x2 | 1.7348              | 1.7391            | 0.0043            |

Table 3. Frenkel and Schottky defect energies for  $\text{La}_{9.33}(\text{GeO}_4)_6\text{O}_2$

| Frenkel Defect                               | Total Energy (eV) | Energy per defect (eV) |
|----------------------------------------------|-------------------|------------------------|
| O                                            | 2.94              | 1.47                   |
| Ge                                           | 23.28             | 11.64                  |
| La1                                          | 14.65             | 7.32                   |
| La2                                          | 7.70              | 3.85                   |
|                                              |                   |                        |
|                                              |                   |                        |
| Schottky Defect                              | Total Energy (eV) | Energy per defect (eV) |
| $\text{La}_{9.33}(\text{GeO}_4)_6\text{O}_2$ | 180.51            | 5.76                   |
| $\text{La}_2\text{O}_3$ -type                | 21.28             | 4.26                   |
| $\text{GeO}_2$ -type                         | 14.74             | 4.91                   |

### 3. Molecular dynamics (MD) results

The results showed that all the oxide ions are mobile, with the average activation energy in the range 873-1273K being 0.98 eV, which reduces to 0.61 eV at higher temperatures.

Figure 3. Diffusion coefficients for oxide ions from MD calculations

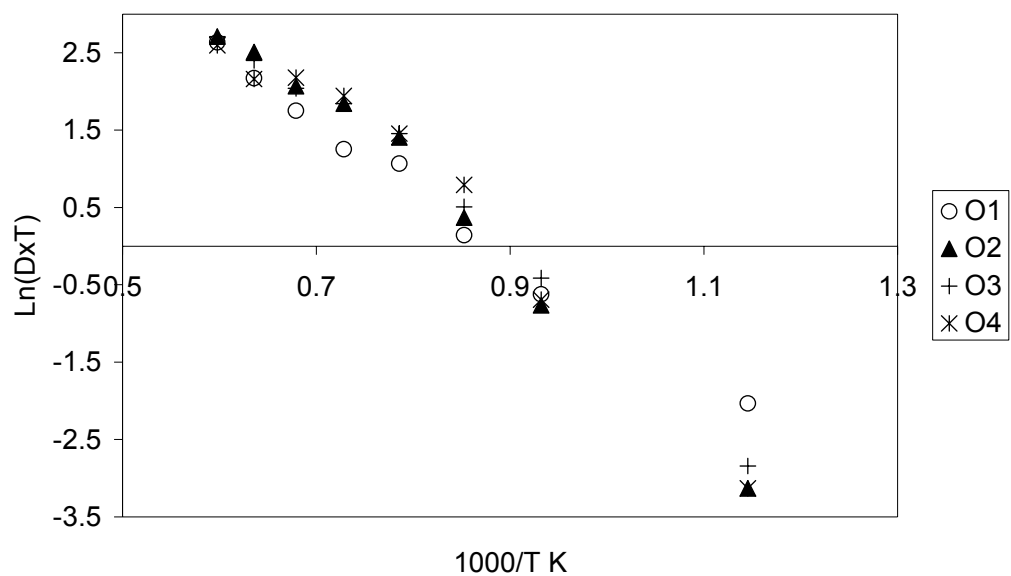

Figure 4. Snapshot of the oxygen trajectories from MD simulations at 1473K showing the “fan-like” conduction pathway along the c-axis between neighbouring  $\text{GeO}_4$  units. The figure shows significant lattice relaxation during the conduction process.

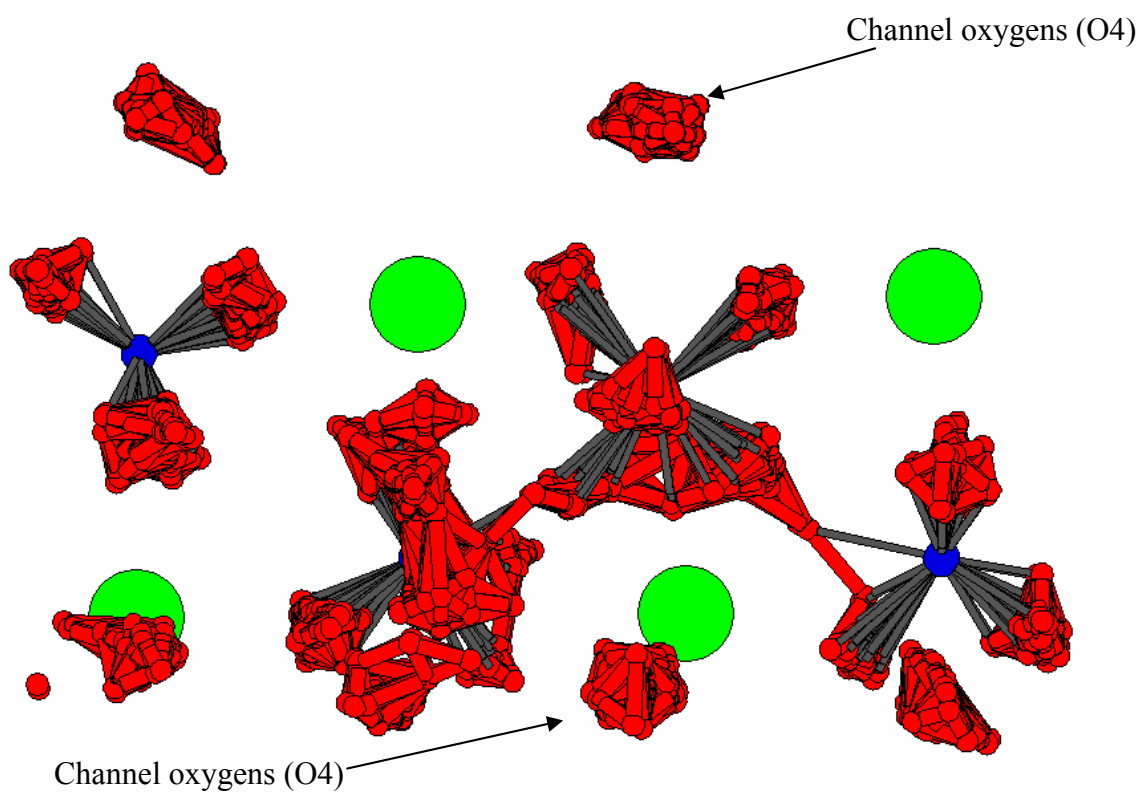

Figure 5. MD trajectory plot for oxygen diffusion at 1473K showing formation of interstitial defects and considerable motion of oxygens in the ab plane (red=O, white=Ge, Green=La)

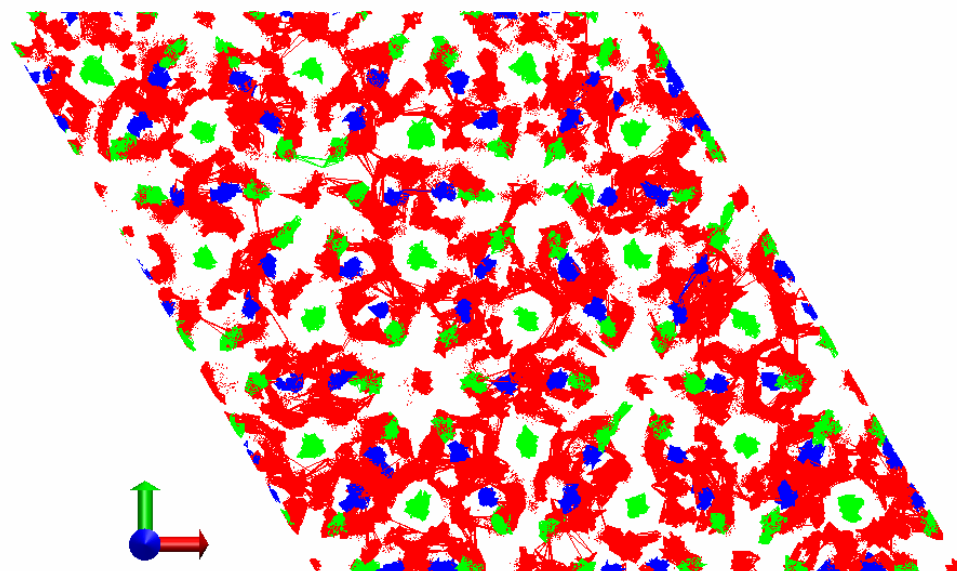

Figure 6. Skeletal drawings of the  $\text{GeO}_4$  tetrahedra in  $\text{La}_{9.33}(\text{GeO}_4)_6\text{O}_2$  at 1473K, showing a large degree of  $\text{GeO}_4$  tetrahedra rotation

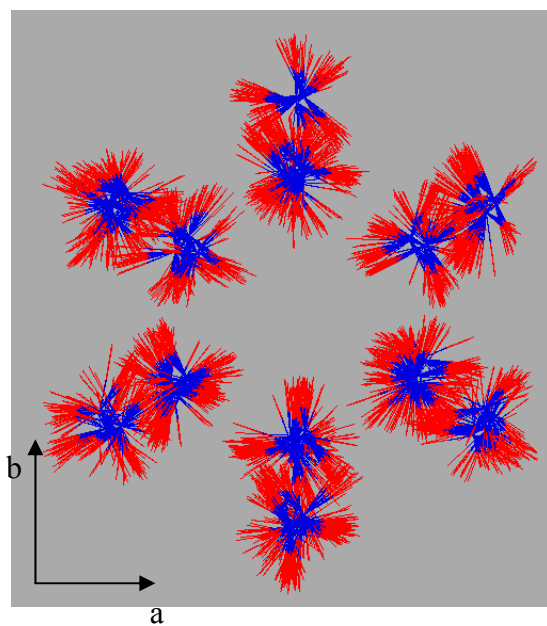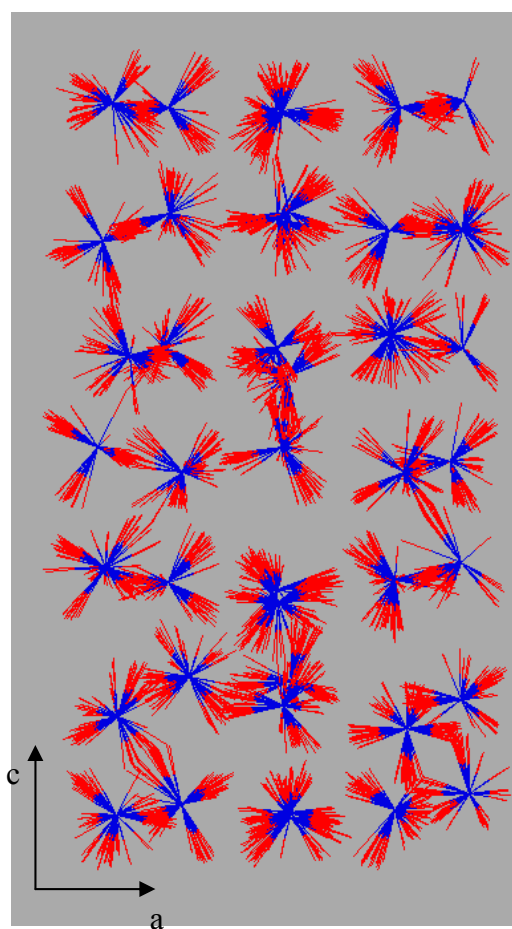

Supplement: b716814d.pdf [file b716814d.pdf]
